# Supplementary material
Source: publisher figshare collection journal article supplement (https://karger.figshare.com/ndownloader/files/28249344)
Supplement: Supplementary file 1 [file 28249344]

Long term risk of autoimmune diseases other than systemic lupus erythematosus in cutaneous lupus erythematosus-alone patients: a 10-year nationwide cohort study

Short title: Risk of autoimmune diseases in cutaneous lupus erythematosus-alone patients

Teng-Li Lin, MD, 1 Chun-Ying Wu, MD, PhD, MPH, LL.M.,2-7 Chao-Kuei Juan, MD,1,2 Yun-Ting Chang, MD, PhD,2,8 Yi-Ju Chen MD, PhD,1,2,7*

| Supplementary table 1. Autoimmune diseases identified in this study | | |
| --- | --- | --- |
| Diseases characterized by tissue specific autoantigens | ICD9 codes | HV |
| Hashimoto's autoimmune thyroiditis | 245.2 |  |
| Celiac disease | 579.0 |  |
| Graves' disease | 242.0、242.00、242.01 |  |
| Diabetes mellitus, type 1 | 250.03、250.13、250.23、250.33、250.43、250.53、250.63、250.73、250.83、250.93 | * |
| Vitiligo | 709.01 |  |
| Rheumatic fever | 390、391.0、391.1、391.2、391.8、391.9、392.0、392.9 |  |
| Pernicious anemia | 281.0 |  |
| Immune thrombocytopenic purpura | 287.31 |  |
| Antiphospholipid syndrome | 286.53 |  |
| Autoimmune Addison's disease | 279.49 |  |
| Dermatitis herpetiformis | 694.0 |  |
| HLA-B27-associated acute anterior uveitis | 360.12 |  |
| Myasthenia gravis | 358.0 | * |
| Cicatricial pemphigoid | 694.6、694.60、694.61 |  |
| Wegener's granulomatosis | 446.4 | * |
| Autoimmune hemolytic anemia | 283.0 |  |
| Microscopic polyangiitis | 446.0 | * |
| Bullous pemphigoid | 694.5 |  |
| Linear morphea | 701.0 |  |
| Relapsing polychondritis | 733.9、733.90、733.92、733.99 |  |
| Pemphigus vulgaris | 694.4 | * |
| Pemphigus foliaceus | 694.4 | * |
| Epidermolysis bullosa acquisita | 757.39 | * |
| Diseases characterized by ubiquitously expressed autoantigens | ICD 9 codes |  |
| Rheumatoid arthritis | 714.0 | * |
| Multiple sclerosis | 340 | * |
| Systemic lupus erythematosus | 710.0 | * |
| Scleroderma | 701.0 |  |
| Autoimmune hepatitis type I | 571.42 |  |
| Primary biliary cirrhosis | 571.6 | * |
| Sjögren's syndrome | 710.2 | * |
| Polymyositis/ Dermatomyositis | 710.3 | * |
| Autoimmune hepatitis type II | 571.42 |  |
